# Supplementary material for: Analysis of Hepatocellular Carcinoma Stereotactic Body Radiation Therapy Dose Prescription Method Using Uncomplicated Tumour Control Probability Model
Source: Research Square preprint supplement (doi:10.21203/rs.3.rs-200189/v1), 2021-02-13
Supplement: Supplementary file 1 [file aced05b567394b4cb94baa57.docx]

**S1 Table. GTV mean BED, control outcome, liver-GTV mean BED and toxicity outcome per patient.** (1=yes, 0 = no)

| Patient | GTV mean BED (Gy) | Tumour control in 6 months | Liver-GTV mean BED (Gy) | | RILD |
| --- | --- | --- | --- | --- | --- |
| 1 | 113.2 | 1 | | 45.2 | 0 |
| 2 | 103.3 | 1 | | 21.4 | 0 |
| 3 | 122.0 | 1 | | 35.9 | 0 |
| 4 | 125.9 | 1 | | 47.6 | 0 |
| 5 | 100.3 | 1 | | 48.8 | 0 |
| 6 | 94.2 | 1 | | 44.8 | 1 |
| 7 | 128.4 | 1 | | 35.8 | 0 |
| 8 | 72.8 | 1 | | 51.4 | 0 |
| 9 | 72.7 | 1 | | 24.3 | 0 |
| 10 | 58.2 | 1 | | 10.2 | 0 |
| 11 | 83.2 | 1 | | 44.8 | 0 |
| 12 | 97.1 | 1 | | 38.0 | 0 |
| 13 | 61.6 | 0 | | 40.5 | 0 |
| 14 | 123.5 | 1 | | 42.4 | 0 |
| 15 | 46.3 | 0 | | 48.3 | 0 |
| 16 | 123.5 | 0 | | 26.5 | 0 |
| 17 | 62.5 | 0 | | 27.0 | 0 |
| 18 | 83.9 | 1 | | 45.0 | 0 |
| 19 | 115.4 | 1 | | 24.1 | 0 |
| 20 | 58.0 | 0 | | 43.9 | 0 |
| 21 | 81.5 | 0 | | 44.1 | 0 |
| 22 | 125.8 | 0 | | 31.1 | 0 |
| 23 | 125.4 | 0 | | 15.3 | 0 |
| 24 | 57.4 | 0 | | 42.9 | 0 |
| 25 | 92.9 | 1 | | 21.3 | 0 |
| 26 | 120.2 | 1 | | 40.3 | 0 |
| 27 | 96.8 | 1 | | 43.0 | 0 |
| 28 | 104.0 | 1 | | 41.8 | 0 |
| 29 | 131.8 | 1 | | 46.1 | 1 |
| 30 | 122.3 | 1 | | 29.2 | 0 |
| 31 | 82.2 | 1 | | 45.6 | 0 |
| 32 | 61.8 | 1 | | 12.6 | 0 |
| 33 | 117.7 | 1 | | 30.2 | 0 |
| 34 | 116.1 | 1 | | 46.1 | 0 |
| 35 | 97.5 | 1 | | 44.6 | 0 |
| 36 | 72.8 | 0 | | 43.5 | 0 |
| 37 | 80.2 | 1 | | 45.0 | 0 |
| 38 | 126.0 | 1 | | 19.3 | 0 |
| 39 | 123.2 | 1 | | 34.6 | 0 |
| 40 | 75.0 | 0 | | 39.2 | 0 |
| 41 | 89.7 | 0 | | 23.1 | 0 |
| 42 | 84.4 | 1 | | 46.2 | 0 |
| 43 | 102.1 | 1 | | 40.6 | 0 |
| 44 | 120.2 | 1 | | 46.8 | 0 |
| 45 | 122.2 | 0 | | 38.4 | 0 |
| 46 | 76.8 | 1 | | 24.3 | 0 |
| 47 | 60.6 | 0 | | 46.9 | 0 |
| 48 | 51.9 | 0 | | 50.6 | 0 |
| 49 | 62.3 | 0 | | 33.5 | 0 |
| 50 | 100.9 | 0 | | 41.9 | 0 |
| 51 | 129.8 | 1 | | 32.1 | 0 |
